# Supplementary material for: Repeatability and Reproducibility of Decisions by Latent Fingerprint Examiners
Source: PLOS journal article supplement (doi:10.1371/journal.pone.0032800), 2012-03-12
Supplement: S3 (10.1371/journal.pone.0032800.s003) [file journal.pone.0032800.s003]

### **Representativeness of retest participants**

|                              | $\text{FNR}_{\text{CMP}}$ | $\text{TPR}_{\text{PRES}}$ | $\text{TNR}_{\text{PRES}}$ |
|------------------------------|---------------------------|----------------------------|----------------------------|
| Retest (72 examiners)        | 8.8%                      | 31.4%                      | 72.9%                      |
| Multi42 (42 examiners)       | 6.3%                      | 34.0%                      | 71.8%                      |
| Not retested (55 examiners)  | 6.4%                      | 31.4%                      | 68.2%                      |
| Initial test (169 examiners) | 7.5%                      | 32.0%                      | 71.2%                      |

Table S3a: Representativeness of the retest participants with respect to the 169 participants whose performance results were previously published. Three rates are shown for each group:  $\text{FNR}_{\text{CMP}}$ , false negative rate among all comparisons performed;  $\text{TPR}_{\text{PRES}}$ , true positive rate among all presentations of mated pairs; and  $\text{TNR}_{\text{PRES}}$ , true negative rate among all presentations of nonmated pairs. Retest participants had a notably higher false negative rate than those who were not retested. Assignment of participants to the retest or the multiple purpose test (*Multi42*) was based on geographic location.
